# Supplementary material for: ‘Low-Salt’ Bread as an Important Component of a Pragmatic Reduced-Salt Diet for Lowering Blood Pressure in Adults with Elevated Blood Pressure
Source: MDPI journal article supplement (doi:10.3390/nu11081725), 2019-07-26
Supplement: s1 [file s1]

**Table S1.** Regression analysis of potential predictors of response of systolic blood pressure.

| <b>Predictor</b>    | <b>B</b> | <b>Standard Error</b> | <b>P-value</b> |
|---------------------|----------|-----------------------|----------------|
| Dietary salt period | -6.23    | 1.81                  | 0.001          |
| Sex                 | 0.75     | 1.89                  | 0.69           |
| Smoking status      | -0.47    | 2.82                  | 0.87           |
| Vitamin D status    | -0.10    | 0.07                  | 0.19           |
| Age                 | 0.07     | 0.11                  | 0.51           |
| BMI                 | -0.20    | 0.226                 | 0.38           |

\*Additional model including urinary sodium and systolic blood pressure at baseline showed these were non-significant determinants ( $P=0.14$  and  $P=0.95$ , respectively) and dietary salt periods remained a significant predictor ( $P=0.008$ ).
